# Supplementary material
Source: PubMed Central journal article supplement (PMC4611239)
Supplement: hdy201544x2.pdf [file hdy201544x2.pdf]

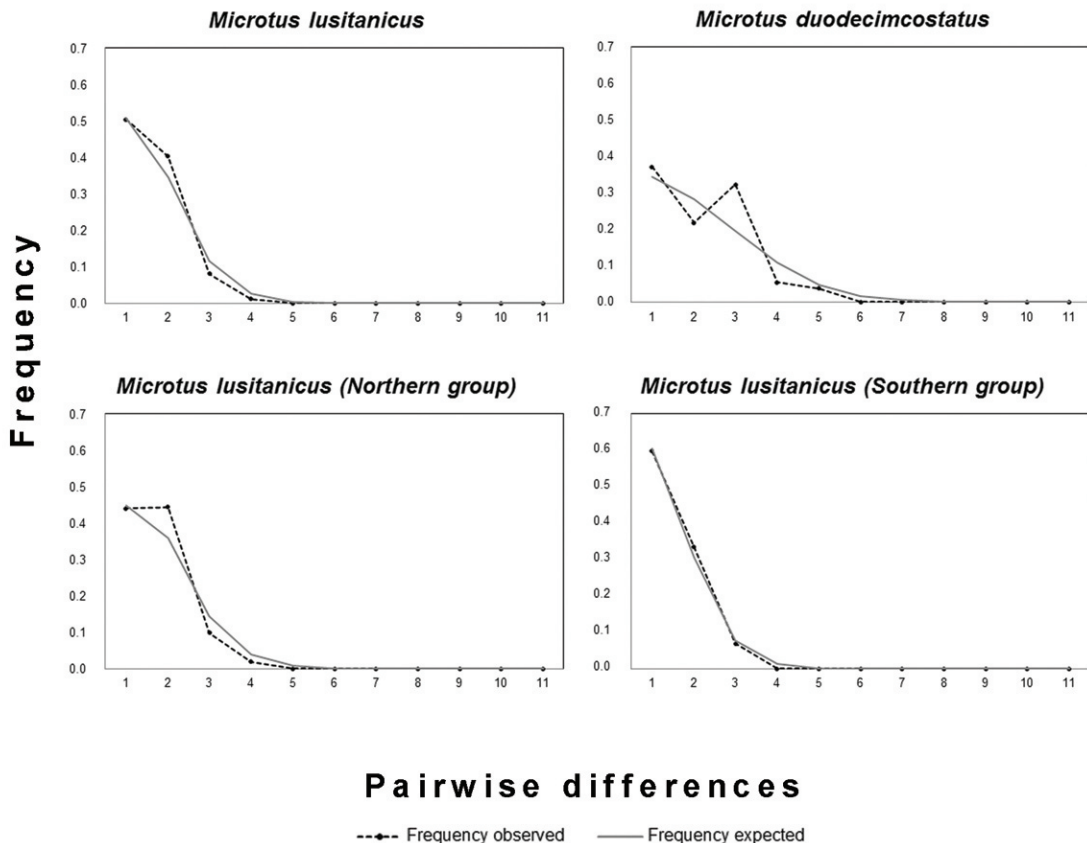

**Supplementary Figure S1** Frequency distributions of the number of pairwise nucleotide differences (mismatch distributions) between *p53* haplotypes of *M. lusitanicus*, *M. duodecimcostatus* and regional groups of *M. lusitanicus*, according to the sudden-expansion model.
