# Supplementary material
Source: PubMed Central journal article supplement (PMC4611239)
Supplement: hdy201544x4.pdf [file hdy201544x4.pdf]

Quina *et al.*

**Supplementary Table S1** Distribution of the 21 *p53* haplotypes found in the 96 sampled individuals of *M. lusitanicus* and *M. duodecimcostatus* according to sampling sites (country and location).

| Sampling sites  | Location                    | Species                    | Sample size | <i>p53</i> Haplotypes |          |          |          |           |           |          |           |           |          |          |          |          |          |          |          |          |          |          |          |    |
|-----------------|-----------------------------|----------------------------|-------------|-----------------------|----------|----------|----------|-----------|-----------|----------|-----------|-----------|----------|----------|----------|----------|----------|----------|----------|----------|----------|----------|----------|----|
|                 |                             |                            |             | 1                     | 2        | 3        | 4        | 5         | 6         | 7        | 8         | 9         | 10       | 11       | 12       | 13       | 14       | 15       | 16       | 17       | 18       | 19       | 20       | 21 |
| <b>Portugal</b> |                             |                            |             |                       |          |          |          |           |           |          |           |           |          |          |          |          |          |          |          |          |          |          |          |    |
| 4               | Bragança                    | <i>M. lusitanicus</i>      | 7           |                       |          |          |          | 2         |           |          | 2         | 9         |          |          |          |          |          |          |          |          |          | 1        |          |    |
| 5               | Alijó                       | <i>M. lusitanicus</i>      | 1           |                       |          |          |          |           | 1         |          | 1         |           |          |          |          |          |          |          |          |          |          |          |          |    |
| 6               | Vieira do Minho             | <i>M. lusitanicus</i>      | 1           |                       |          |          |          |           |           |          | 1         | 1         |          |          |          |          |          |          |          |          |          |          |          |    |
| 7               | Mangualde                   | <i>M. lusitanicus</i>      | 2           |                       |          |          |          | 4         |           |          |           |           |          |          |          |          |          |          |          |          |          |          |          |    |
| 8 <sup>1</sup>  | Idanha-a-Nova               | <i>M. lusitanicus</i>      | 1           |                       |          |          |          | 1         | 1         |          |           |           |          |          |          |          |          |          |          |          |          |          |          |    |
| 8 <sup>1</sup>  | Idanha-a-Nova               | <i>M. duodecimcostatus</i> | 2           | 1                     |          |          |          | 3         |           |          |           |           |          |          |          |          |          |          |          |          |          |          |          |    |
| 9               | Tomar                       | <i>M. lusitanicus</i>      | 2           |                       |          |          |          | 3         | 1         |          |           |           |          |          |          |          |          |          |          |          |          |          |          |    |
| 10              | Candeeiros                  | <i>M. lusitanicus</i>      | 2           |                       |          |          |          | 2         |           | 2        |           |           |          |          |          |          |          |          |          |          |          |          |          |    |
| 11              | Mafra                       | <i>M. lusitanicus</i>      | 2           |                       |          |          |          | 3         | 1         |          |           |           |          |          |          |          |          |          |          |          |          |          |          |    |
| 12 <sup>1</sup> | Mora                        | <i>M. lusitanicus</i>      | 1           |                       |          |          |          | 2         |           |          |           |           |          |          |          |          |          |          |          |          |          |          |          |    |
| 13 <sup>1</sup> | S. Mamede                   | <i>M. lusitanicus</i>      | 7           |                       |          |          |          | 12        | 2         |          |           |           |          |          |          |          |          |          |          |          |          |          |          |    |
| 13 <sup>1</sup> | S. Mamede                   | <i>M. duodecimcostatus</i> | 6           | 5                     |          |          |          | 4         |           |          |           |           | 1        | 2        |          |          |          |          |          |          |          |          |          |    |
| 14              | Central Alentejo            | <i>M. duodecimcostatus</i> | 6           | 8                     |          |          |          | 3         |           |          |           |           | 1        |          |          |          |          |          |          |          |          |          |          |    |
| 15              | East Alentejo               | <i>M. duodecimcostatus</i> | 2           | 3                     | 1        |          |          |           |           |          |           |           |          |          |          |          |          |          |          |          |          |          |          |    |
| 16              | Odeleite                    | <i>M. duodecimcostatus</i> | 4           | 5                     |          |          |          |           |           |          |           |           | 1        | 1        | 1        |          |          |          |          |          |          |          |          |    |
| 17              | Tavira                      | <i>M. duodecimcostatus</i> | 2           | 1                     | 1        |          |          | 1         |           |          |           |           | 1        |          |          |          |          |          |          |          |          |          |          |    |
| 18              | Portimão                    | <i>M. duodecimcostatus</i> | 4           | 2                     | 2        | 3        | 1        |           |           |          |           |           |          |          |          |          |          |          |          |          |          |          |          |    |
| 19              | Monchique                   | <i>M. lusitanicus</i>      | 5           |                       |          |          |          | 6         | 4         |          |           |           |          |          |          |          |          |          |          |          |          |          |          |    |
| <b>Spain</b>    |                             |                            |             |                       |          |          |          |           |           |          |           |           |          |          |          |          |          |          |          |          |          |          |          |    |
| 1               | West Asturias               | <i>M. lusitanicus</i>      | 2           |                       |          |          |          |           |           |          | 4         |           |          |          |          |          |          |          |          |          |          |          |          |    |
| 2               | East Asturias               | <i>M. lusitanicus</i>      | 16          |                       |          |          |          | 4         |           |          | 22        |           |          |          | 2        | 1        |          |          | 1        | 1        |          |          | 1        |    |
| 3               | Northwest Castilla and León | <i>M. lusitanicus</i>      | 3           |                       |          |          |          | 1         | 1         |          |           |           | 3        |          |          |          |          |          |          |          |          |          | 1        |    |
| 20              | Granada, Andalusia          | <i>M. duodecimcostatus</i> | 5           | 10                    |          |          |          |           |           |          |           |           |          |          |          |          |          |          |          |          |          |          |          |    |
| 21              | Córdoba, Andalusia          | <i>M. duodecimcostatus</i> | 1           | 1                     | 1        |          |          |           |           |          |           |           |          |          |          |          |          |          |          |          |          |          |          |    |
| 22 <sup>1</sup> | Southeast Madrid            | <i>M. duodecimcostatus</i> | 3           | 6                     |          |          |          |           |           |          |           |           |          |          |          |          |          |          |          |          |          |          |          |    |
| 23 <sup>1</sup> | Northwest Madrid            | <i>M. duodecimcostatus</i> | 6           | 7                     |          |          |          |           |           |          |           |           | 1        |          |          |          | 3        | 1        |          |          |          |          |          |    |
| 24              | Manlleu, Catalonia          | <i>M. duodecimcostatus</i> | 3           | 3                     |          |          |          |           |           |          |           |           |          |          | 3        |          |          |          |          |          |          |          |          |    |
| <b>Total</b>    |                             |                            | <b>96</b>   | <b>52</b>             | <b>5</b> | <b>3</b> | <b>1</b> | <b>51</b> | <b>11</b> | <b>2</b> | <b>30</b> | <b>13</b> | <b>2</b> | <b>4</b> | <b>6</b> | <b>2</b> | <b>1</b> | <b>3</b> | <b>1</b> | <b>1</b> | <b>1</b> | <b>1</b> | <b>1</b> |    |

<sup>1</sup>Sampling sites located in the sympatry area
