# Supplementary material
Source: PubMed Central journal article supplement (PMC4611239)
Supplement: hdy201544x5.pdf [file hdy201544x5.pdf]

**Quina et al.**

**Supplementary Table S2** GenBank accession numbers of *Microtus* species used in *p53* exons 5-7 and *cytb* gene analyses.

| Species                             | GenBank accession numbers                                             | Reference                   |
|-------------------------------------|-----------------------------------------------------------------------|-----------------------------|
| <b>p53 exons 5-7</b>                |                                                                       |                             |
| <i>Microtus agrestis</i>            | AF014046                                                              | DeWoody, 1999               |
| <i>Microtus arvalis</i>             | AF014018-21, 23, 25-26, 29, 31-32, 38-42                              | DeWoody, 1999               |
| <i>Microtus oeconomus</i>           | AF014043-45                                                           | DeWoody, 1999               |
| <i>Microtus rossiaemeridionalis</i> | AF014017, 22, 24, 27-28, 30, 33-36                                    | DeWoody, 1999               |
| <i>Microtus ochrogaster</i>         | XM_005349777                                                          | -                           |
| <b>cytb gene</b>                    |                                                                       |                             |
| <i>Microtus duodecimcostatus</i>    | AY513796-7                                                            | Jaarola et al, 2004         |
| <i>Microtus duodecimcostatus</i>    | AJ717744                                                              | Tougaard et al, 2008        |
| <i>Microtus duodecimcostatus</i>    | JX457797-806                                                          | Barbosa et al, 2013         |
| <i>Microtus duodecimcostatus</i>    | JX424124-130,136-139,141,142,158,161-174,176-179,181,182,191-197, 211 | Bastos-Silveira et al, 2012 |
| <i>Microtus lusitanicus</i>         | AY513812-3                                                            | Jaarola et al, 2004         |
| <i>Microtus lusitanicus</i>         | AJ717746                                                              | Tougaard et al, 2008        |
| <i>Microtus lusitanicus</i>         | JX457761-96                                                           | Barbosa et al, 2013         |
| <i>Microtus lusitanicus</i>         | JX424119-123,131,133-135,140,143,144,146-156,159,160,175,183,198- 210 | Bastos-Silveira et al, 2012 |
| <i>Microtus gerbei</i>              | AY513800                                                              | Jaarola et al, 2004         |
| <i>Microtus gerbei</i>              | JX457807                                                              | Barbosa et al, 2013         |

**References:**

Barbosa S, Pauperio J, Searle JB, Alves PC (2013). Genetic identification of Iberian rodent species using both mitochondrial and nuclear loci: application to noninvasive sampling. *Mol Ecol Resour* 13(1): 43-56.

Bastos-Silveira C, Santos SM, Monarca R, Mathias Mda L, Heckel G (2012). Deep mitochondrial introgression and hybridization among ecologically divergent vole species. *Mol Ecol* 21(21): 5309-5323.

DeWoody JA (1999). Nucleotide variation in the p53 tumor-suppressor gene of voles from Chernobyl, Ukraine. *Mutat Res* 439(1): 25-36.

Jaarola M, Martinkova N, Gunduz I, Brunhoff C, Zima J, Nadachowski A et al (2004). Molecular phylogeny of the speciose vole genus *Microtus* (Arvicolinae, Rodentia) inferred from mitochondrial DNA sequences. *Mol Phylogenet Evol* 33(3): 647-663.

Tougard C, Brunet-Lecomte P, Fabre M, Montuire S (2008). Evolutionary history of two allopatric *Terricola* species (Arvicolinae, Rodentia) from molecular, morphological, and palaeontological data. *Biol J Linn Soc* 93(2): 309-323.
