# Supplementary material
Source: PubMed Central journal article supplement (PMC4611239)
Supplement: hdy201544x6.pdf [file hdy201544x6.pdf]

**Quina et al.**

**Supplementary Table S3** GenBank accession numbers of additional mammalian species, including rodents, used in *p53* exons 5-7 analyses.

| <b>Species</b>                   | <b>GenBank accession numbers</b> |
|----------------------------------|----------------------------------|
| <i>Bos indicus</i>               | U74486                           |
| <i>Bos mutus</i>                 | XM_005894802                     |
| <i>Bos taurus</i>                | X81704                           |
| <i>Bubalus bubalis</i>           | JF792632                         |
| <i>Callithrix jacchus</i>        | XM_002747948                     |
| <i>Canis lupus familiaris</i>    | AB020761                         |
| <i>Capra hircus</i>              | XM_005693530                     |
| <i>Cavia porcellus</i>           | NM_001172740                     |
| <i>Ceratotherium simum simum</i> | XM_004433119                     |
| <i>Cercopithecus aethiops</i>    | X16384                           |
| <i>Condylura cristata</i>        | XM_004684639                     |
| <i>Cricetulus griseus</i>        | U50395                           |
| <i>Delphinapterus leucas</i>     | AF475081                         |
| <i>Eospalax baileyi</i>          | JX998170                         |
| <i>Eospalax cansus</i>           | JX998172                         |
| <i>Equus caballus</i>            | NM_001202405                     |
| <i>Felis catus</i>               | D26608                           |
| <i>Gorilla gorilla gorilla</i>   | XM_004058511                     |
| <i>Heterocephalus glaber</i>     | XM_004857448                     |
| <i>Homo sapiens</i>              | AB082923                         |
| <i>Jaculus jaculus</i>           | XM_004669213                     |
| <i>Macaca fascicularis</i>       | U48957                           |
| <i>Macaca fuscata</i>            | AF456344                         |
| <i>Macaca mulatta</i>            | U48956                           |
| <i>Marmota monax</i>             | AJ001022                         |
| <i>Meriones unguiculatus</i>     | AB033632                         |
| <i>Mesocricetus auratus</i>      | NM_001281661                     |
| <i>Mus musculus</i>              | AB020317                         |
| <i>Mustela putorius furo</i>     | XM_004760255                     |

|                                        |              |
|----------------------------------------|--------------|
| <i>Myotis brandtii</i>                 | XM_005878763 |
| <i>Nomascus leucogenys</i>             | XM_003274633 |
| <i>Ochotona princeps</i>               | XM_004594783 |
| <i>Octodon degus</i>                   | XM_004638423 |
| <i>Odobenus rosmarus divergens</i>     | XM_004398491 |
| <i>Orcinus orca</i>                    | XM_004266896 |
| <i>Oryctolagus cuniculus</i>           | NM_001082404 |
| <i>Otlemur garnettii</i>               | XM_003791135 |
| <i>Ovis aries</i>                      | X81705       |
| <i>Pan paniscus</i>                    | XM_003810066 |
| <i>Pan troglodytes</i>                 | XM_001172077 |
| <i>Pantholops hodgsonii</i>            | XM_005967859 |
| <i>Papio anubis</i>                    | XM_003912272 |
| <i>Pongo abelii</i>                    | XM_002826974 |
| <i>Rattus norvegicus</i>               | NM_030989    |
| <i>Saimiri boliviensis boliviensis</i> | XM_003929186 |
| <i>Sarcophilus harrisii</i>            | XM_003768762 |
| <i>Sorex araneus</i>                   | XM_004604858 |
| <i>Spalax judaei</i>                   | AJ783406     |
| <i>Sus scrofa</i>                      | NM_213824    |
| <i>Trichechus manatus latirostris</i>  | XM_004376021 |
| <i>Tupaia chinensis</i>                | AF175893     |
| <i>Tursiops truncatus</i>              | XM_004310610 |
