# Supplementary material
Source: PubMed Central journal article supplement (PMC4611239)
Supplement: hdy201544x7.pdf [file hdy201544x7.pdf]

**Quina et al.**

**Supplementary Table S4** Results from mismatch distribution analysis and neutrality tests for *p53* in *M. duodecimcostatus* and *M. lusitanicus*. Significant p-values are shown in bold. Numbers in parenthesis are the upper and lower bound of the 95% confidence interval (1000 bootstrap replicates). Parameters:  $\theta_0$ , pre-expansion population size;  $\theta_1$ , post-expansion population size;  $\tau$ , expansion age;  $\theta$ , population size (assuming constant deme); M, migration rate. SSD: sum of square deviations; *hg*: Harpending's raggedness index.

| Species                                  | Sudden-expansion model |            |                        |                       |        |           |        | Spatial-expansion model |         |                        |                       |             |           |        | Neutrality tests       |        |                                |        |
|------------------------------------------|------------------------|------------|------------------------|-----------------------|--------|-----------|--------|-------------------------|---------|------------------------|-----------------------|-------------|-----------|--------|------------------------|--------|--------------------------------|--------|
|                                          | Parameters             |            |                        | Goodness-of-fit tests |        |           |        | Parameters              |         |                        | Goodness-of-fit tests |             |           |        | Tajima's <i>D</i> test |        | Fu's <i>F<sub>s</sub></i> test |        |
|                                          | $\theta_0$             | $\theta_1$ | $\tau$                 | SSD                   | $\rho$ | <i>hg</i> | $\rho$ | $\theta$                | M       | $\tau$                 | SSD                   | $\rho$      | <i>hg</i> | $\rho$ | Tajima's <i>D</i>      | $\rho$ | <i>F<sub>s</sub></i>           | $\rho$ |
| <i>Microtus duodecimcostatus</i>         | 0.000                  | 2.339      | 1.934<br>(0.000-4.521) | 0.02                  | 0.24   | 0.11      | 0.41   | 0.001                   | 3.825   | 1.656<br>(0.299-3.678) | 0.02                  | 0.34        | 0.11      | 0.53   | -0.88                  | 0.20   | -3.41                          | 0.07   |
| <i>Microtus lusitanicus</i> <sup>1</sup> | 0.000                  | 99999.0    | 0.680<br>(0.430-1.086) | 0.01                  | 0.14   | 0.12      | 0.19   | 0.003                   | 99999.0 | 0.681<br>(0.294-0.982) | 0.01                  | <b>0.03</b> | 0.12      | 0.18   | -1.28                  | 0.10   | -4.17                          | 0.03   |
| Northern group <sup>1</sup>              | 0.000                  | 99999.0    | 0.801<br>(0.414-1.430) | 0.01                  | 0.10   | 0.13      | 0.10   | 0.001                   | 99999.0 | 0.800<br>(0.305-1.305) | 0.01                  | <b>0.03</b> | 0.13      | 0.11   | -1.12                  | 0.13   | -3.07                          | 0.04   |
| Southern group                           | 0.000                  | 99999.0    | 0.504<br>(0.215-0.977) | 0.00                  | 0.65   | 0.14      | 0.54   | 0.014                   | 99999.0 | 0.512<br>(0.165-1.170) | 0.00                  | 0.46        | 0.14      | 0.49   | 0.05                   | 0.62   | 0.18                           | 0.46   |

<sup>1</sup>Segment of extra repeat motifs (10bp) was removed from aligned sequences.
