# Supplementary material
Source: PubMed Central journal article supplement (PMC4611239)
Supplement: hdy201544x8.pdf [file hdy201544x8.pdf]

**Quina et al.**

**Supplementary Table S5** Likelihood ratio statistics from branch, site-specific and branch-site tests using PAML software on *p53* exonic sequences (189 bp) of *Microtus*, rodent and mammalian lineages.

|                 | <b>N<sup>1</sup></b> | <b>Model tests</b>         | <b>d.f.<sup>2</sup></b> | <b>2ΔI</b> | <b>p<sup>3</sup></b> | <b>Positively-selected sites<sup>4</sup></b> |
|-----------------|----------------------|----------------------------|-------------------------|------------|----------------------|----------------------------------------------|
| <b>Microtus</b> | 7                    | Branch test                |                         |            |                      |                                              |
|                 |                      | M0-Model=2                 | 1                       |            |                      |                                              |
|                 |                      | Selected branch:           |                         |            |                      |                                              |
|                 |                      | <i>M. duodecimcostatus</i> |                         | 5.735      | 0.017                |                                              |
|                 |                      | <i>M. lusitanicus</i>      |                         | 0          | 1                    |                                              |
|                 |                      | Site-specific tests        |                         |            |                      |                                              |
|                 |                      | M0-M3                      | 4                       | 0          | 1                    | M3: -                                        |
|                 |                      | M1-M2                      | 2                       | 0.00005    | 0.99998              | M2: -                                        |
|                 |                      | M7-M8                      | 2                       | ND         | -                    | M8: -                                        |
|                 |                      | Branch-site test           |                         |            |                      |                                              |
|                 |                      | Foreground branch:         |                         |            |                      |                                              |
|                 |                      | <i>M. duodecimcostatus</i> |                         | 0.665      | 0.415                | Model A: 228E (0.943)                        |
|                 |                      | <i>M. lusitanicus</i>      |                         | 0          | 1                    | Model A: -                                   |
| <b>Rodents</b>  | 20                   | Branch test                |                         |            |                      |                                              |
|                 |                      | M0-Model=2                 | 1                       |            |                      |                                              |
|                 |                      | Selected branch:           |                         |            |                      |                                              |
|                 |                      | <i>M. duodecimcostatus</i> |                         | 3.981      | 0.046                |                                              |
|                 |                      | <i>M. lusitanicus</i>      |                         | 0          | 1                    |                                              |
|                 |                      | Site-specific tests        |                         |            |                      |                                              |
|                 |                      | M0-M3                      | 4                       | 14.611     | 0.005                | M3: -                                        |
|                 |                      | M1-M2                      | 2                       | 0          | 1                    | M2: -                                        |
|                 |                      | M7-M8                      | 2                       | ND         | -                    | M8: -                                        |
|                 |                      | Branch-site test           |                         |            |                      |                                              |
|                 |                      | Foreground branch:         |                         |            |                      |                                              |
|                 |                      | <i>M. duodecimcostatus</i> |                         | 0.743      | 0.389                | Model A: 228E (0.976)                        |
|                 |                      | <i>M. lusitanicus</i>      |                         | 0          | 1                    | Model A: -                                   |
|                 |                      | <i>Spalax judaei</i>       |                         | 0          | 1                    | Model A: 174K (0.569)                        |
| <b>Mammals</b>  | 52                   | Branch test                |                         |            |                      |                                              |
|                 |                      | M0-Model=2                 | 1                       |            |                      |                                              |
|                 |                      | Selected branch:           |                         |            |                      |                                              |
|                 |                      | <i>M. duodecimcostatus</i> |                         | 3.771      | 0.052                |                                              |
|                 |                      | <i>M. lusitanicus</i>      |                         | 0.000002   | 0.997                |                                              |
|                 |                      | Site-specific tests        |                         |            |                      |                                              |
|                 |                      | M0-M3                      | 4                       | 110.867    | 0                    | M3: 209R (0.999)                             |
|                 |                      | M1-M2                      | 2                       | 0          | 1                    | M2: -                                        |
|                 |                      | M7-M8                      | 2                       | ND         | -                    | M8: -                                        |
|                 |                      | Branch-site test           |                         |            |                      |                                              |
|                 |                      | Foreground branch:         |                         |            |                      |                                              |
|                 |                      | <i>M. duodecimcostatus</i> |                         | 0.724      | 0.395                | Model A: 228E (0.982)                        |
|                 |                      | <i>M. lusitanicus</i>      |                         | 0.000002   | 0.999                | Model A: -                                   |
|                 |                      | <i>Spalax judaei</i>       |                         | 0          | 1                    | Model A: 174K (0.624)                        |

<sup>1</sup> Number of sequences; <sup>2</sup> degrees of freedom; <sup>3</sup> p-value; <sup>4</sup> Posterior probability in parenthesis; ND – not detected ( $2\Delta I < 0$ )
